# Supplementary figures and images for: Functional interactions among neurons within single columns of macaque V1
Source: eLife journal article supplement (doi:10.7554/elife.79322), 2022-11-02

a

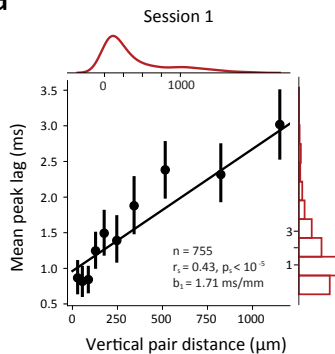

b

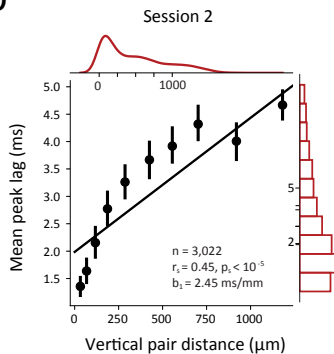

c

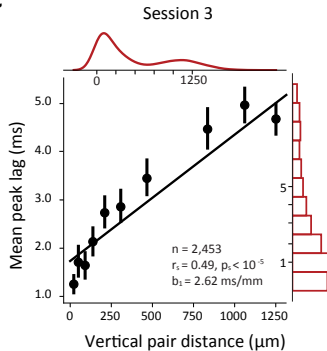

d

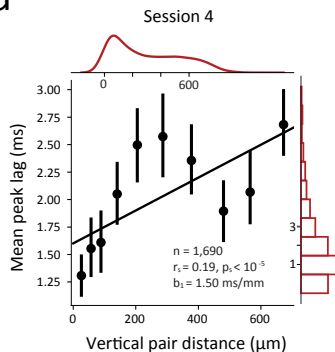

e

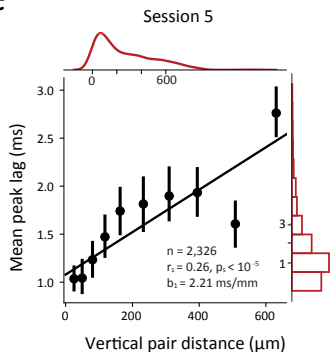

Supplement: supp [file elife_poa_e79322_Figure_2_figure_supplement_1.pdf › elife_poa_e79322_Figure_2_figure_supplement_1.pdf]

a

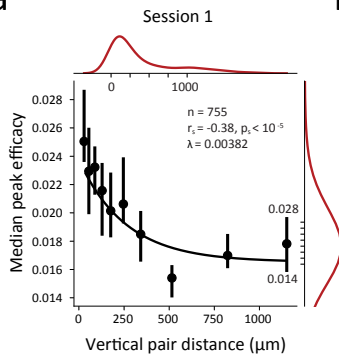

b

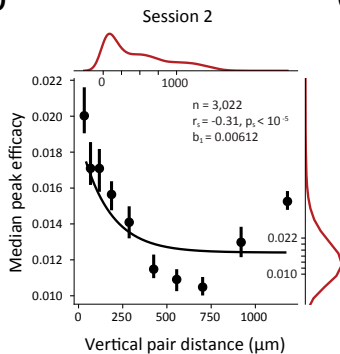

c

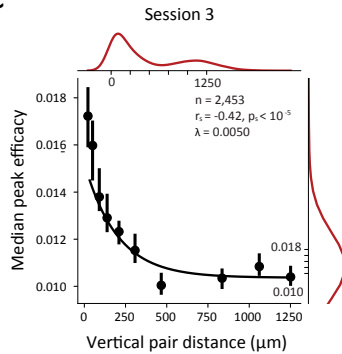

d

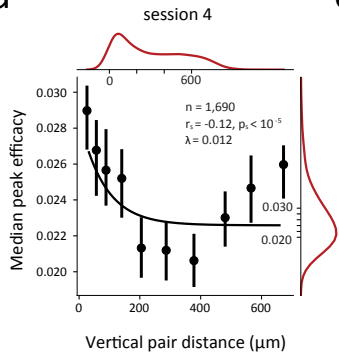

e

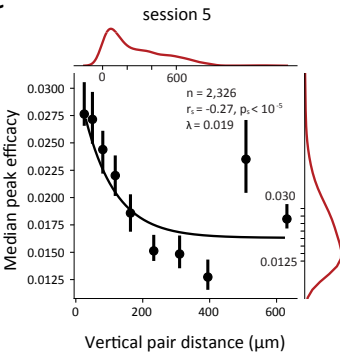

Supplement: supp [file elife_poa_e79322_Figure_2_figure_supplement_2.pdf › elife_poa_e79322_Figure_2_figure_supplement_2.pdf]

**a**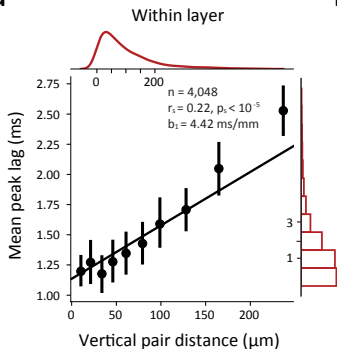**b**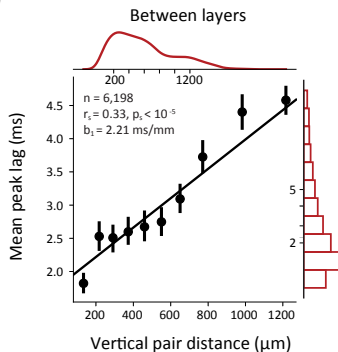**c**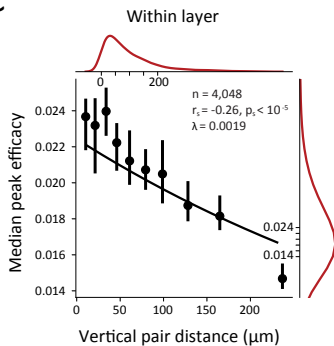**d**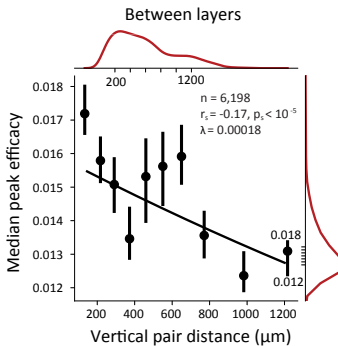

Supplement: supp [file elife_poa_e79322_Figure_2_figure_supplement_3.pdf › elife_poa_e79322_Figure_2_figure_supplement_3.pdf]

a

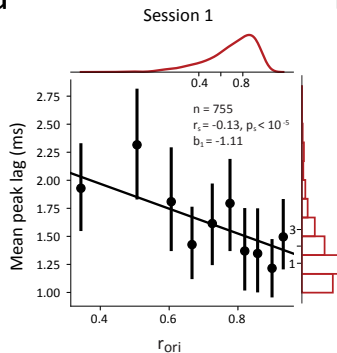

b

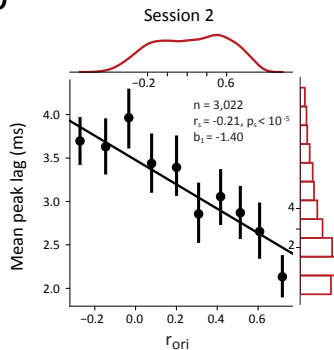

c

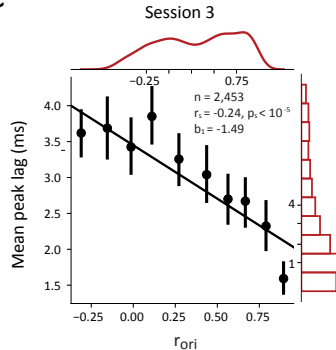

d

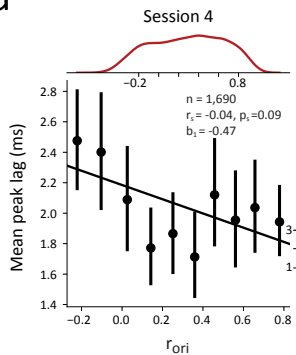

e

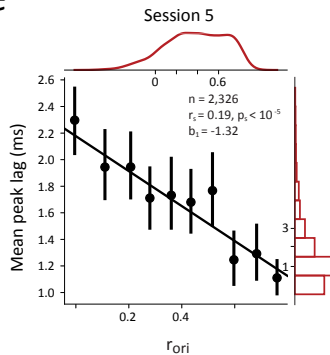

Supplement: supp [file elife_poa_e79322_Figure_3_figure_supplement_1.pdf › elife_poa_e79322_Figure_3_figure_supplement_1.pdf]

a

Session 1

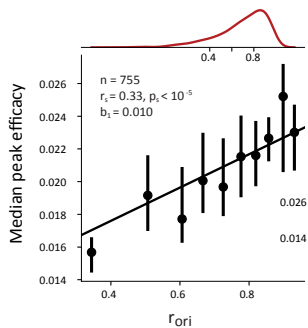

b

Session 2

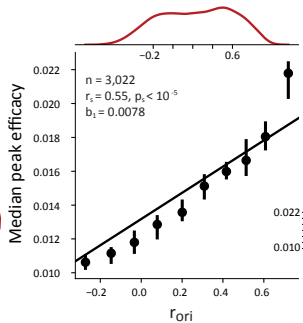

c

Session 3

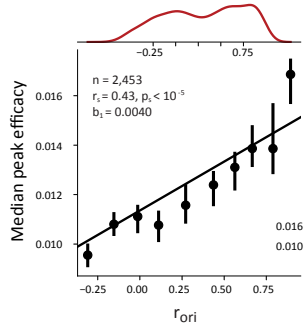

d

Session 4

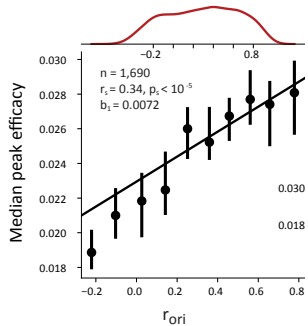

e

Session 5

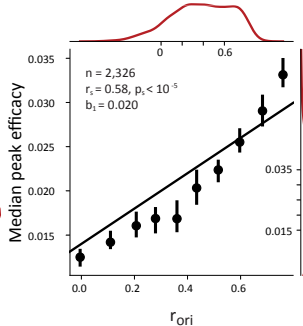

Supplement: supp [file elife_poa_e79322_Figure_3_figure_supplement_2.pdf › elife_poa_e79322_Figure_3_figure_supplement_2.pdf]

**a**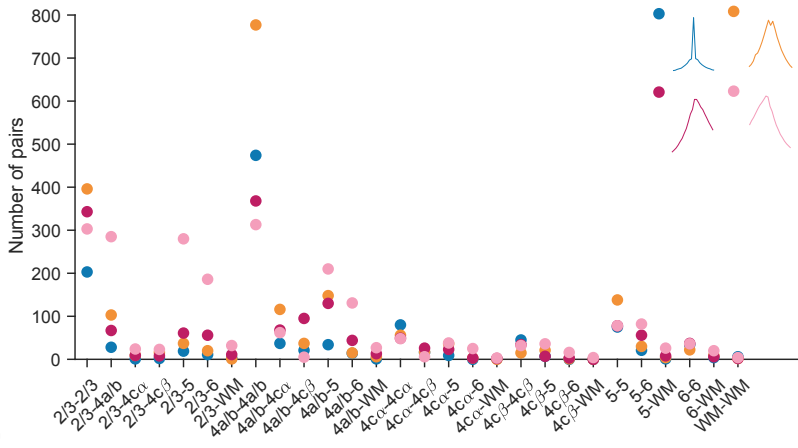**b**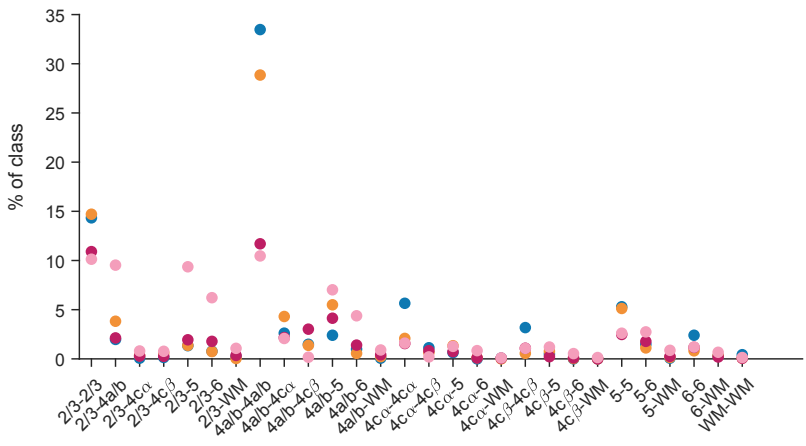

Supplement: supp [file elife_poa_e79322_Figure_5_figure_supplement_1.pdf › elife_poa_e79322_Figure_5_figure_supplement_1.pdf]
